# Supplementary material for: BAR-based optimum adaptive sampling regime for variance minimization in alchemical transformation: the nonequilibrium stratification
Source: Royal Society of Chemistry journal article supplement (doi:10.1039/c7cp07573a), 2018-01-01
Supplement: c7cp07573a1.pdf [file c7cp07573a1.pdf]

# **Supporting Information: BAR-based Optimum Adaptive Sampling Regime for Variance Minimization in Alchemical Transformation: The Nonequilibrium Stratification**

Xiaohui Wang<sup>1</sup>, Xingzhao Tu<sup>3</sup>, John Z.H.Zhang<sup>1,4,5\*</sup>, and Zhaoxi Sun<sup>1,2\*</sup>

<sup>1</sup>*State Key Laboratory of Precision Spectroscopy, East China Normal University, Shanghai 200062, China*

<sup>2</sup>*Computational Biomedicine (IAS-5/INM-9), Forschungszentrum Jülich, Jülich 52425, Germany*

<sup>3</sup>*Institute of Organic Chemistry, University of Leipzig, Leipzig 04103, Germany*

<sup>4</sup>*NYU-ECNU Center for Computational Chemistry at NYU Shanghai, Shanghai 200062, China*

<sup>5</sup>*Department of Chemistry, New York University, NY, NY 10003, USA*

\*To whom correspondence should be addressed: [john.zhang@nyu.edu](mailto:john.zhang@nyu.edu), [proszx@163.com](mailto:proszx@163.com)

**Figure S1.** Structures of molecules simulated in this work. (Red O atom, grey C, white H, green Cl, blue N atom.)

a) SAMPL4-1

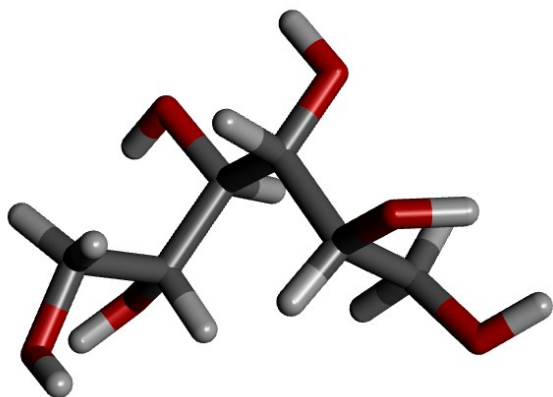

b) SAMPL4-10

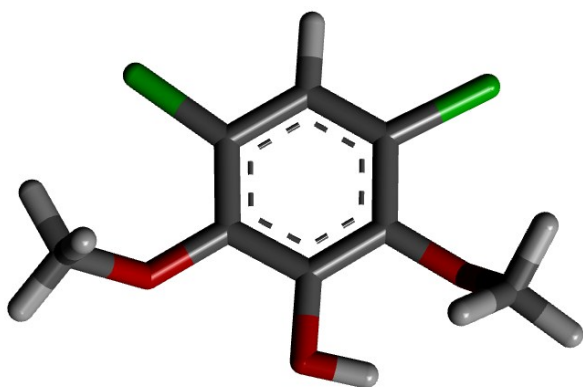

c) SAMPL4-20

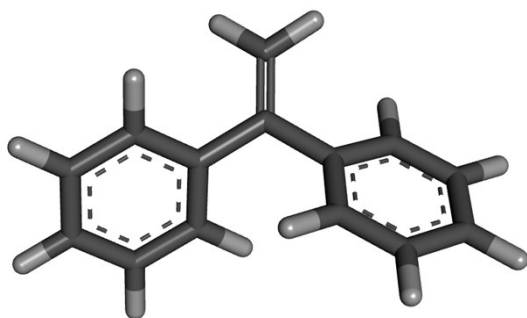

d) model compound for ASP to ASH transformation

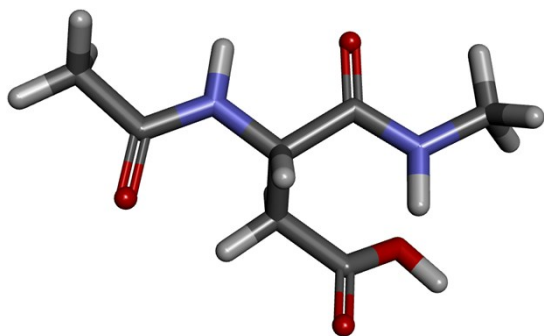

**Figure S2.**Dependence of a)simulation time, b) number of works, c) TDV in each state on the order of magnitude of GOCE criteria, the number of iteration for the ASP example from different viewpoints.

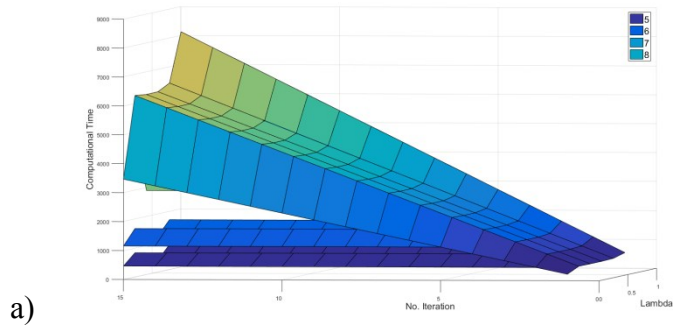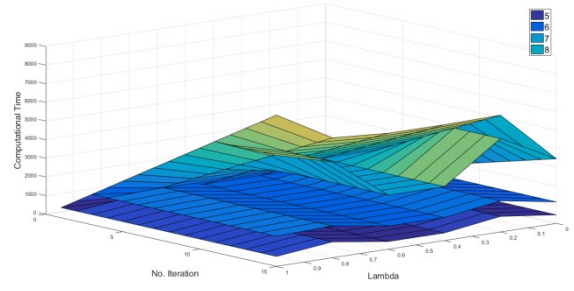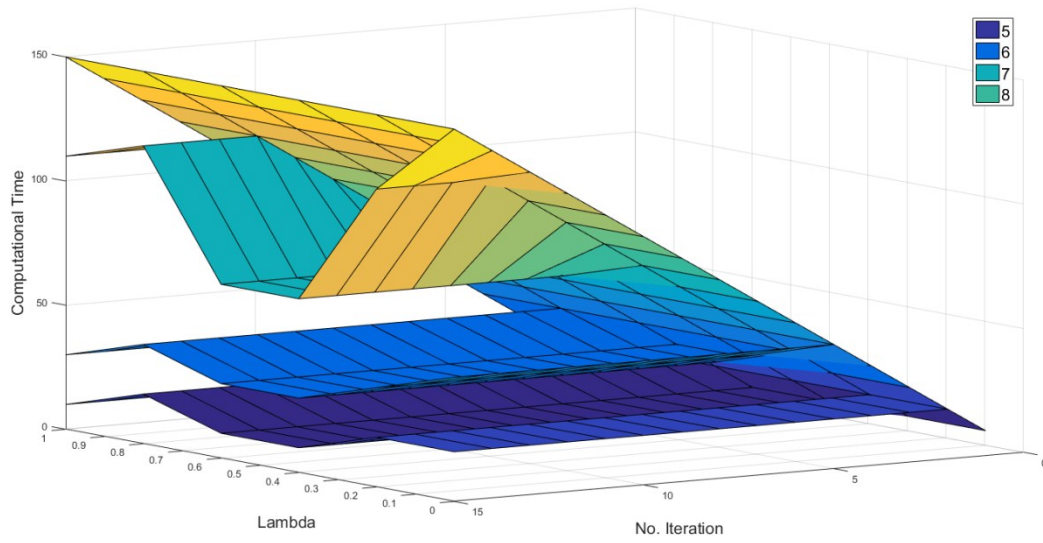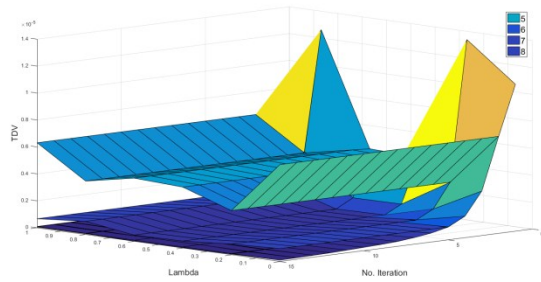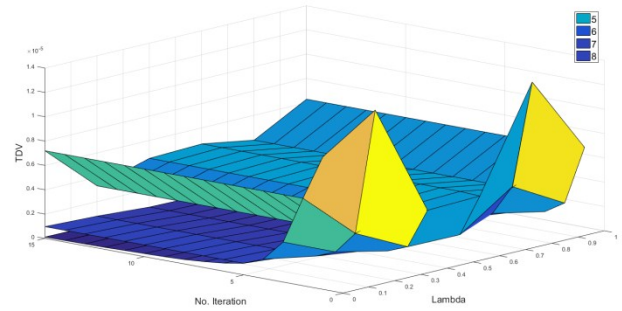

**Table S1.** Absolute % errors.

| Absolute % error | LTL   | GOCE  | NCE    |
|------------------|-------|-------|--------|
| TIP3P            | 2.06% | 2.27% | 4.04%  |
| SAMPL4-1         | 0.00% | 1.03% | 0.79%  |
| SAMPL4-10        | 6.45% | 6.32% | 4.86%  |
| SAMPL4-20        | 3.57% | 4.68% | 10.48% |
| Aspartate        | 0.00% | 0.34% | 0.49%  |
